# Supplementary material
Source: PubMed Central journal article supplement (PMC3982712)
Supplement: 5ed42677651fb248995b800538427106_genetics.113.160572-7.pdf [file 5ed42677651fb248995b800538427106_genetics.113.160572-7.pdf]

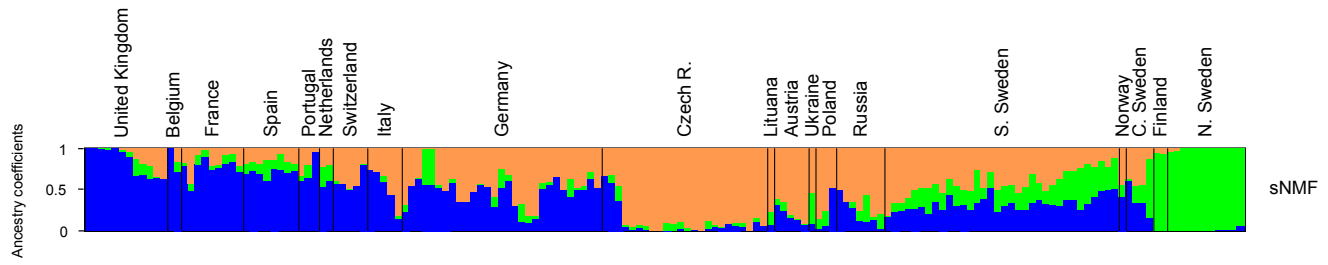

**Figure S3.** Graphical representation of admixture estimates for European populations of *A. thaliana*. Estimated admixture coefficients using sNMF using  $K = 3$  and  $\alpha = 100$  (cross-entropy = 0.483).
