# Supplementary material
Source: PubMed Central journal article supplement (PMC3982712)
Supplement: 7af10288eafe477a88b6a391a57d4023_genetics.113.160572-2.pdf [file 7af10288eafe477a88b6a391a57d4023_genetics.113.160572-2.pdf]

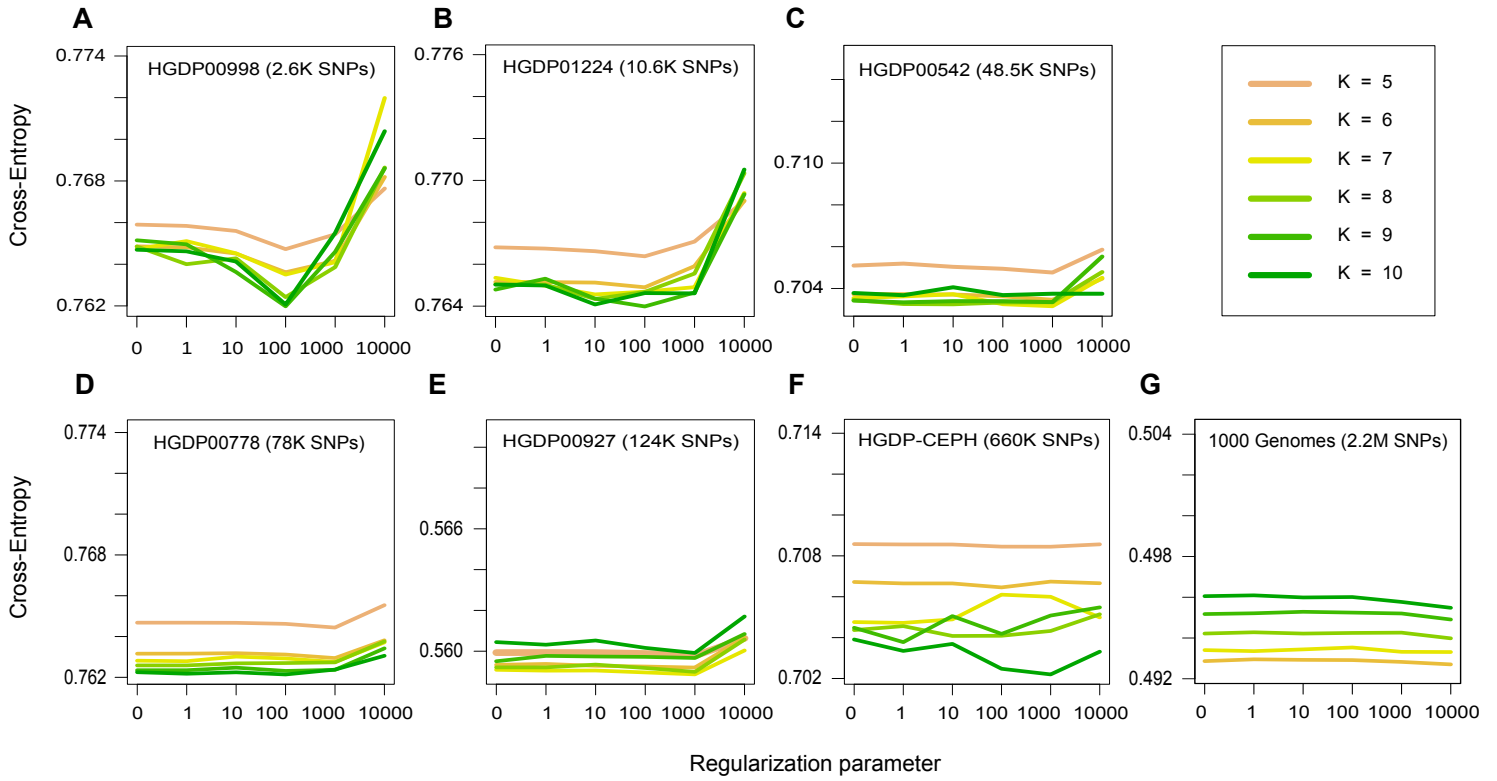

**Figure S2. Values of the cross-entropy criterion for sNMF algorithms.** Minimal values of the cross-entropy criterion over 5 runs of the sNMF program for A-E) 5 Harvard HGDP panel, F) the HGDP-CEPH data, and G) The 1000 Genomes Project data set. The number of clusters ranged from 5 to 10, and the values of the regularization parameter ranged from 0 to 10,000.
