# Supplementary material
Source: PubMed Central journal article supplement (PMC3982712)
Supplement: 31c9d52e7cb8040afd7ac07ef3272c49_genetics.113.160572-1.pdf [file 31c9d52e7cb8040afd7ac07ef3272c49_genetics.113.160572-1.pdf]

**Table S1: Root mean square error (RMSE) for 6 HGDP data sets as a function of the regularization parameter.**

| $\alpha$    | 0                      | 1                      | 10                     | 100                    | 1000                    |
|-------------|------------------------|------------------------|------------------------|------------------------|-------------------------|
| <b>RMSE</b> | 0.046<br>[0.035,0.064] | 0.044<br>[0.035,0.057] | 0.041<br>[0.035,0.052] | 0.041<br>[0.031,0.061] | 0.055<br>[0.033, 0.095] |

**Table S2: Choice of  $K$  for sNMF using the cross-entropy criterion (simulated data).**

|         | Dir(1, 1, 1) | Dir(.5, .5, .5) | Dir(.1, .1, .1) | Dir(.2, .2, .05) | Dir(.2, .2, .5) | Dir(.05, .05, .01) |
|---------|--------------|-----------------|-----------------|------------------|-----------------|--------------------|
| $K = 2$ | 0.713        | 0.703           | 0.682           | 0.662            | 0.706           | 0.645              |
| $K = 3$ | <b>0.707</b> | <b>0.691</b>    | <b>0.660</b>    | <b>0.642</b>     | <b>0.697</b>    | <b>0.624</b>       |
| $K = 4$ | 0.708        | 0.692           | 0.661           | 0.644            | 0.699           | 0.626              |
| $K = 5$ | 0.710        | 0.694           | 0.663           | 0.645            | 0.700           | 0.628              |

Dir: Dirichlet distribution used to simulate "true" admixture coefficients using 3 ancestral populations.

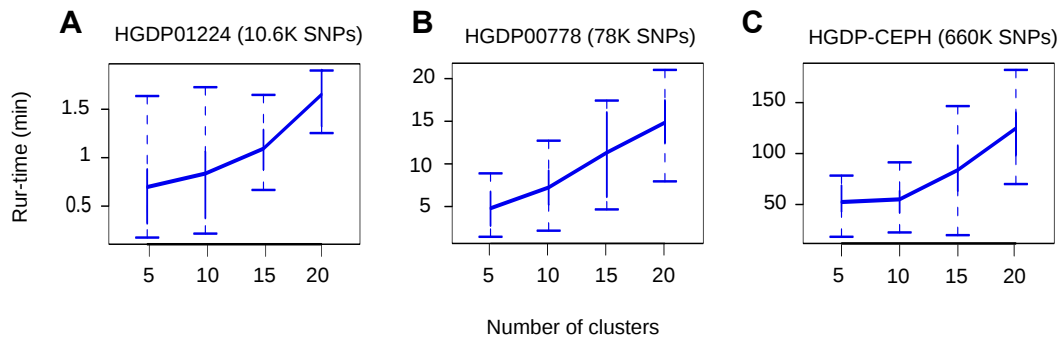

**Figure S1. Run-times for sNMF.** Time is expressed in unit of minutes. A) Run-time analysis for Harvard HGDP panel 01224 (10.6K SNPs). B) Run-time analysis for Harvard HGDP panel 00778 (78K SNPs). C) Run-time analysis for the HGDP-CEPH data (660K SNPs).

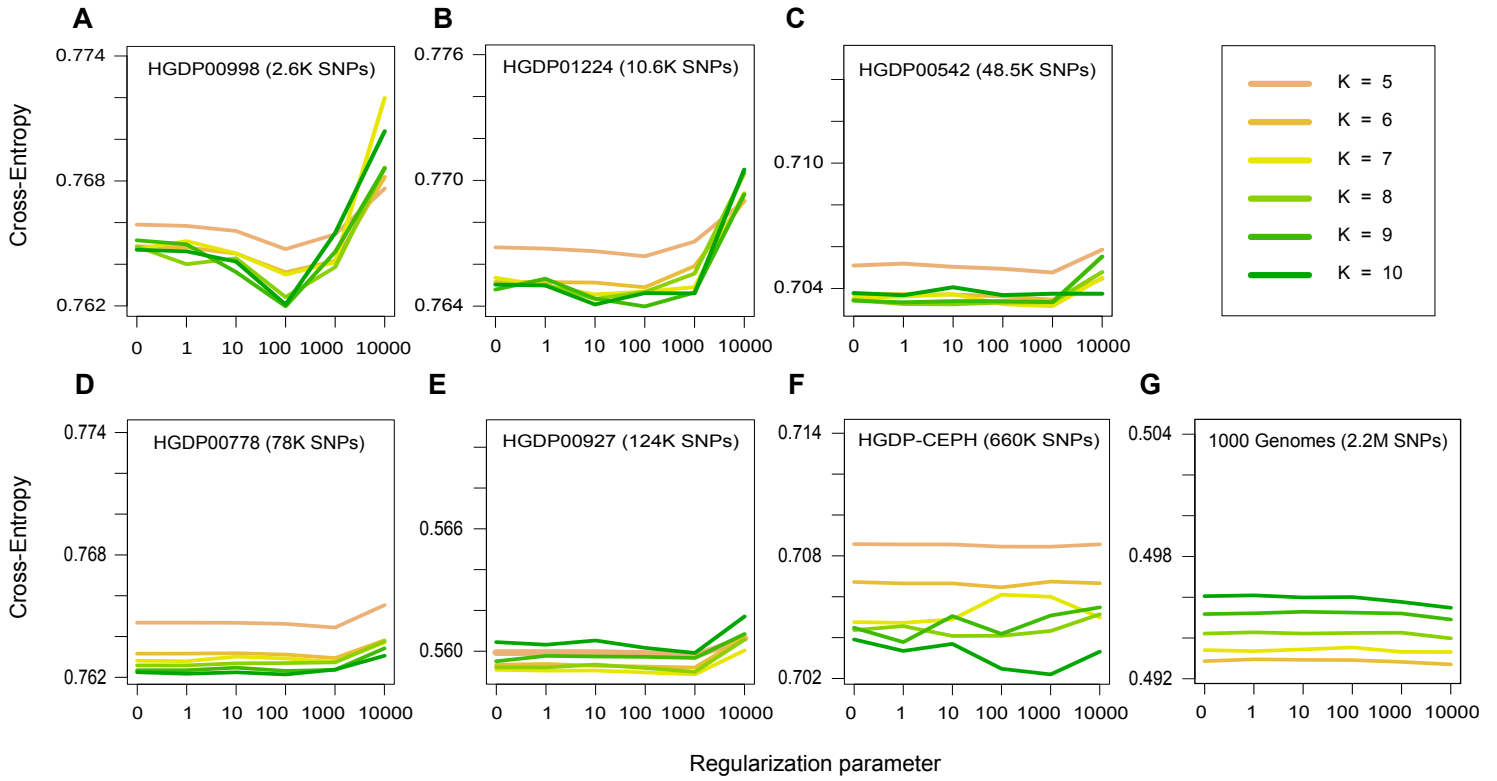

**Figure S2. Values of the cross-entropy criterion for sNMF algorithms.** Minimal values of the cross-entropy criterion over 5 runs of the sNMF program for A-E) 5 Harvard HGDP panel, F) the HGDP-CEPH data, and G) The 1000 Genomes Project data set. The number of clusters ranged from 5 to 10, and the values of the regularization parameter ranged from 0 to 10,000.

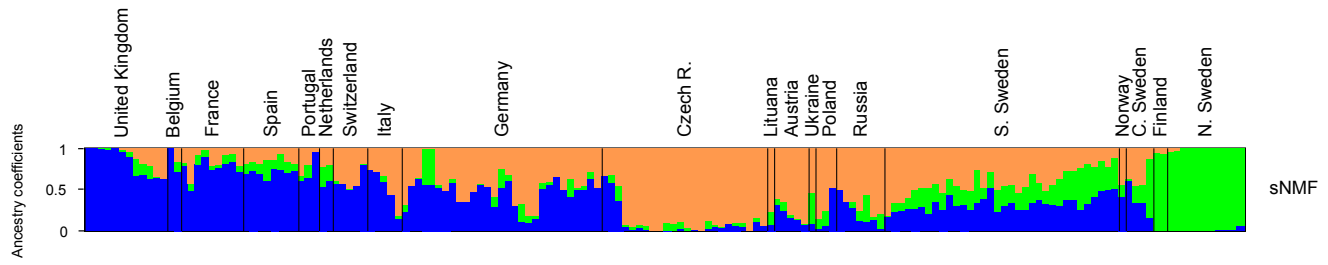

**Figure S3.** Graphical representation of admixture estimates for European populations of *A. thaliana*. Estimated admixture coefficients using sNMF using  $K = 3$  and  $\alpha = 100$  (cross-entropy = 0.483).

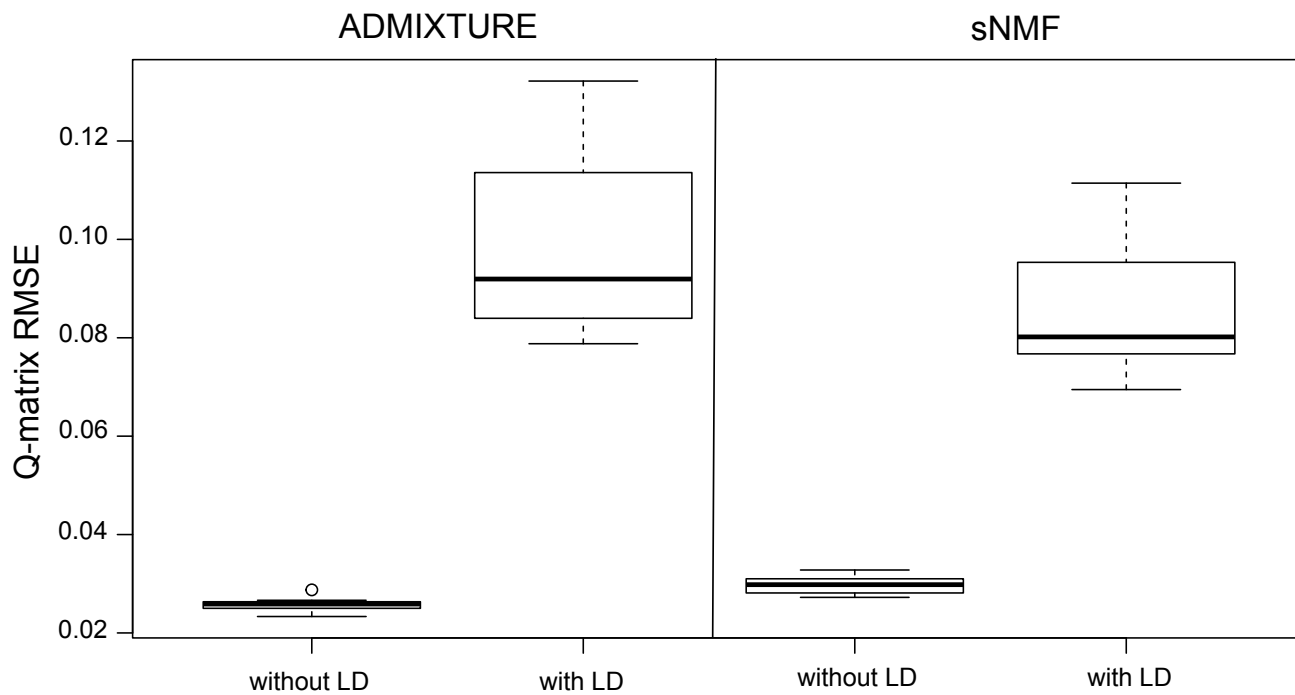

**Figure S4. Accuracy of ADMIXTURE and sNMF in the presence of linkage disequilibrium.**

RMSEs between estimated  $Q$  matrices without and with linkage disequilibrium for ADMIXTURE and sNMF using  $K = 5$  based on subsets of SNPs sampled from the 1000 Genome Project data set.

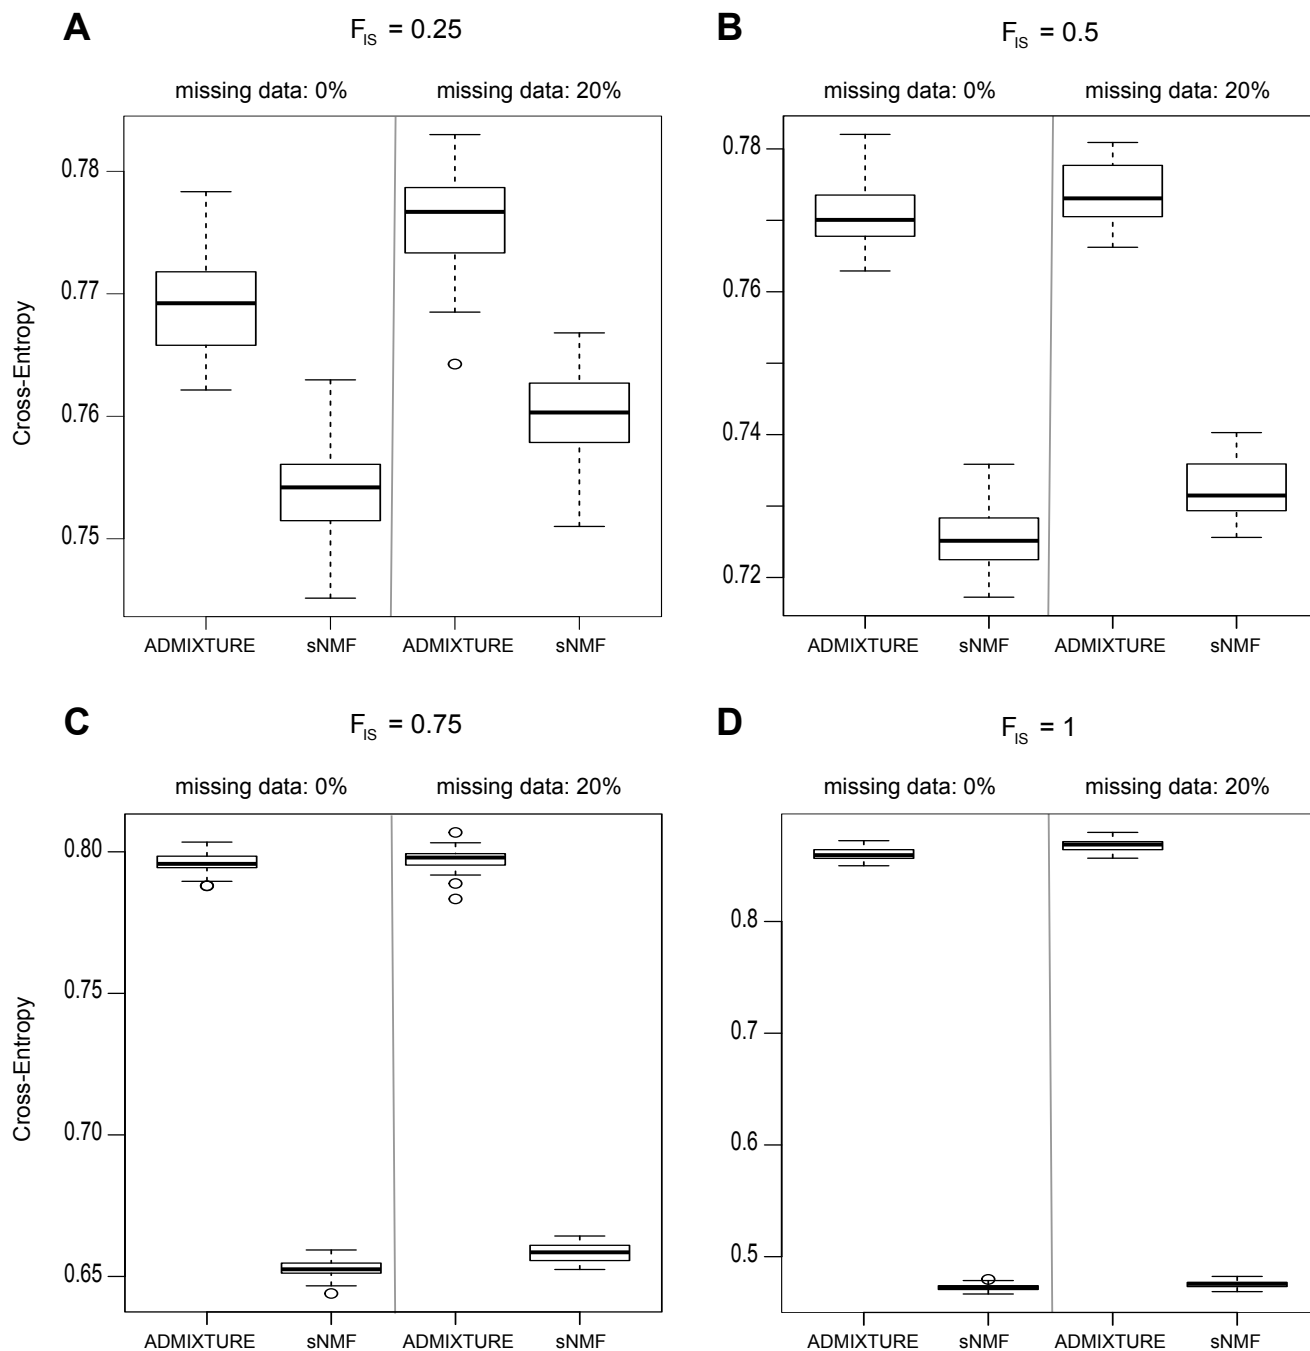

**Figure S5. Accuracy of ADMIXTURE and sNMF in the presence of related individuals.** Cross-entropy criterion for ADMIXTURE and for sNMF. Simulations mimicked the population structure of European populations of *Arabidopsis thaliana*. A-B) Moderate levels of inbreeding,  $F_{IS} = 25 - 50\%$ , C-D) Strong levels of inbreeding,  $F_{IS} = 75 - 100\%$ .
