# Supplementary material
Source: PubMed Central journal article supplement (PMC3982712)
Supplement: 076297737fbaeda186b32cc2a1a5a8b3_genetics.113.160572-6.pdf [file 076297737fbaeda186b32cc2a1a5a8b3_genetics.113.160572-6.pdf]

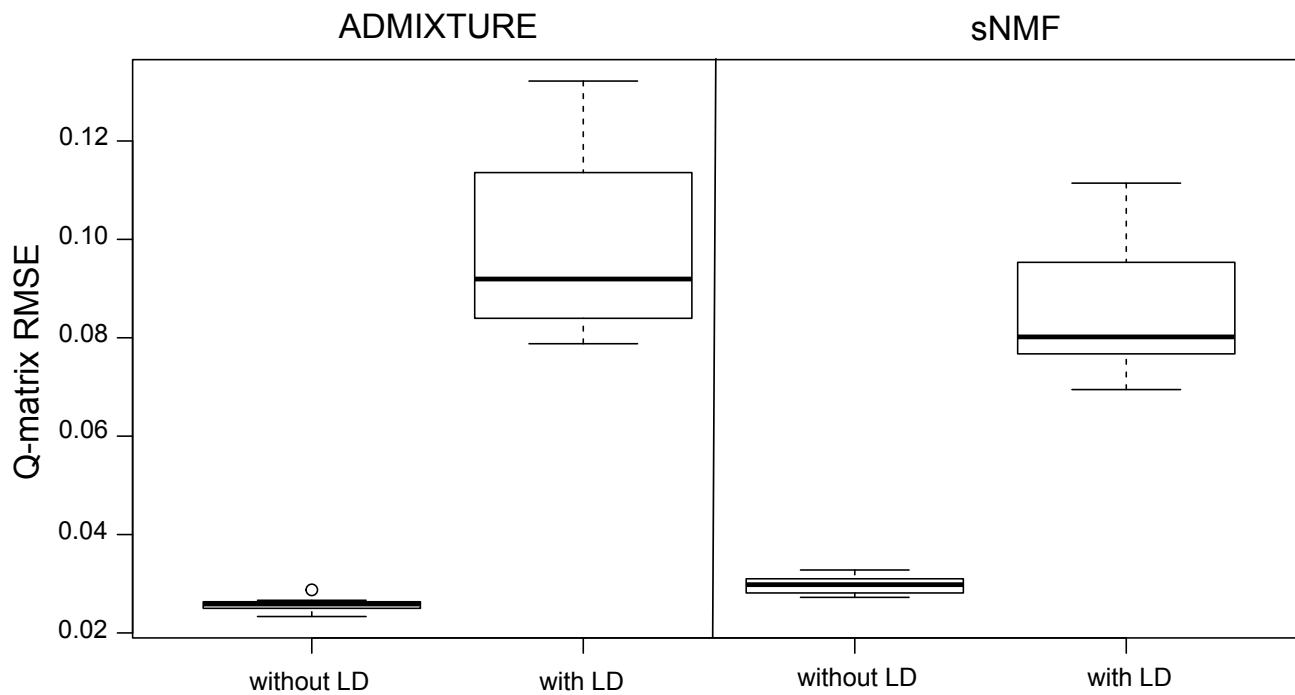

**Figure S4. Accuracy of ADMIXTURE and sNMF in the presence of linkage disequilibrium.**

RMSEs between estimated  $Q$  matrices without and with linkage disequilibrium for ADMIXTURE and sNMF using  $K = 5$  based on subsets of SNPs sampled from the 1000 Genome Project data set.
