# Supplementary material
Source: PubMed Central journal article supplement (PMC3982712)
Supplement: ab03de9cbcaf1ea926c21dc30144f1c2_genetics.113.160572-3.pdf [file ab03de9cbcaf1ea926c21dc30144f1c2_genetics.113.160572-3.pdf]

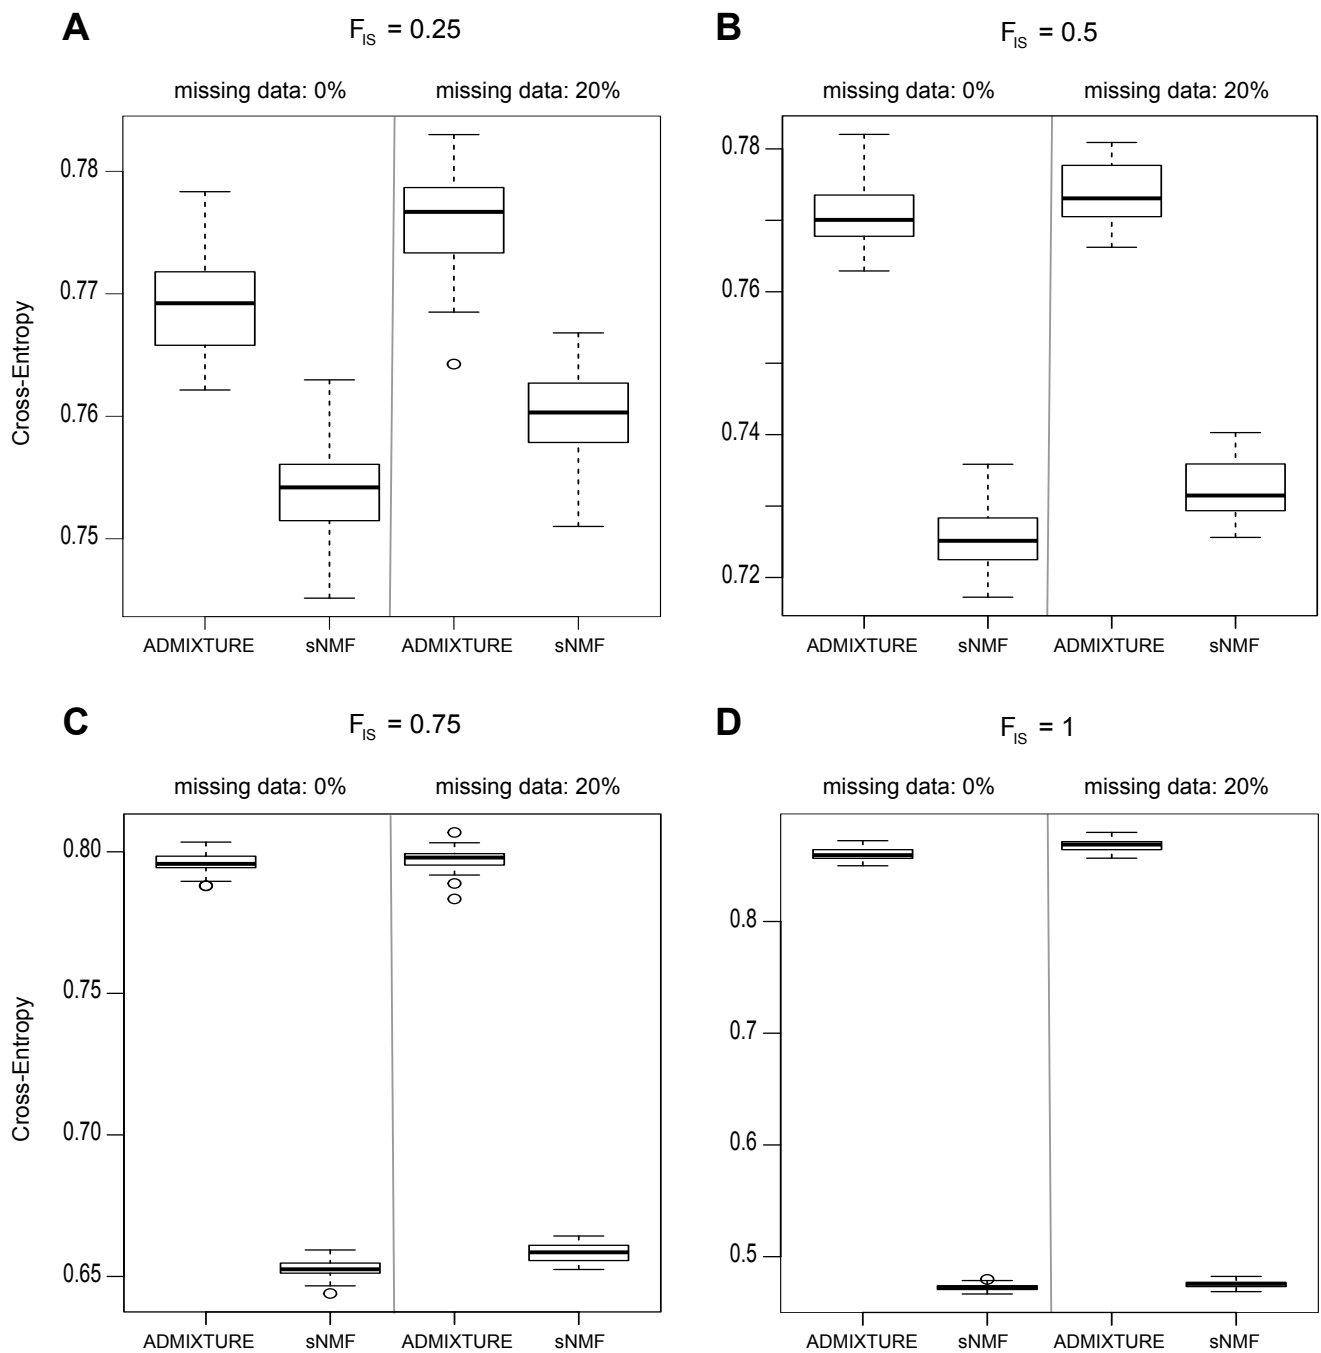

**Figure S5. Accuracy of ADMIXTURE and sNMF in the presence of related individuals.** Cross-entropy criterion for ADMIXTURE and for sNMF. Simulations mimicked the population structure of European populations of *Arabidopsis thaliana*. A-B) Moderate levels of inbreeding,  $F_{IS} = 25 - 50\%$ , C-D) Strong levels of inbreeding,  $F_{IS} = 75 - 100\%$ .
