# Supplementary material
Source: PubMed Central journal article supplement (PMC3982712)
Supplement: cccbd120969b47efebb67250a278eb52_genetics.113.160572-8.pdf [file cccbd120969b47efebb67250a278eb52_genetics.113.160572-8.pdf]

**Table S1: Root mean square error (RMSE) for 6 HGDP data sets as a function of the regularization parameter.**

| $\alpha$    | 0                      | 1                      | 10                     | 100                    | 1000                    |
|-------------|------------------------|------------------------|------------------------|------------------------|-------------------------|
| <b>RMSE</b> | 0.046<br>[0.035,0.064] | 0.044<br>[0.035,0.057] | 0.041<br>[0.035,0.052] | 0.041<br>[0.031,0.061] | 0.055<br>[0.033, 0.095] |
