# Supplementary material
Source: PubMed Central journal article supplement (PMC3982712)
Supplement: cf47b171dba88f23fa935b2388830e63_genetics.113.160572-4.pdf [file cf47b171dba88f23fa935b2388830e63_genetics.113.160572-4.pdf]

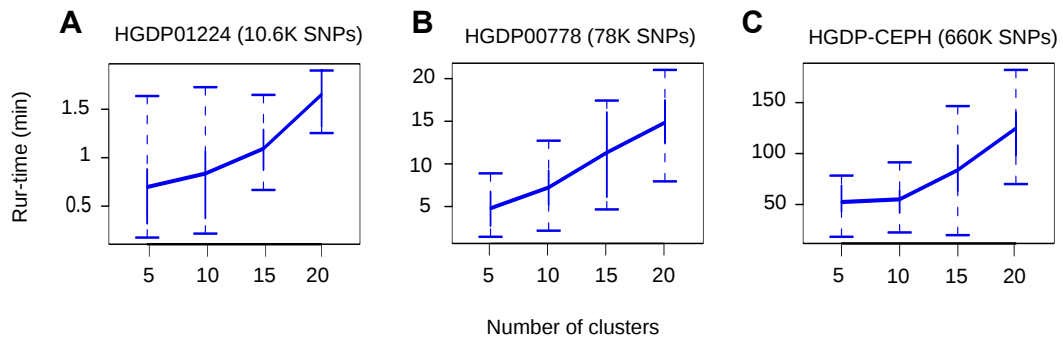

**Figure S1. Run-times for sNMF.** Time is expressed in unit of minutes. A) Run-time analysis for Harvard HGDP panel 01224 (10.6K SNPs). B) Run-time analysis for Harvard HGDP panel 00778 (78K SNPs). C) Run-time analysis for the HGDP-CEPH data (660K SNPs).
