# Supplementary material
Source: PubMed Central journal article supplement (PMC3982712)
Supplement: db48788c0e2d1b68474da373b2c5feb6_genetics.113.160572-5.pdf [file db48788c0e2d1b68474da373b2c5feb6_genetics.113.160572-5.pdf]

**Table S2: Choice of  $K$  for sNMF using the cross-entropy criterion (simulated data).**

|         | Dir(1, 1, 1) | Dir(.5, .5, .5) | Dir(.1, .1, .1) | Dir(.2, .2, .05) | Dir(.2, .2, .5) | Dir(.05, .05, .01) |
|---------|--------------|-----------------|-----------------|------------------|-----------------|--------------------|
| $K = 2$ | 0.713        | 0.703           | 0.682           | 0.662            | 0.706           | 0.645              |
| $K = 3$ | <b>0.707</b> | <b>0.691</b>    | <b>0.660</b>    | <b>0.642</b>     | <b>0.697</b>    | <b>0.624</b>       |
| $K = 4$ | 0.708        | 0.692           | 0.661           | 0.644            | 0.699           | 0.626              |
| $K = 5$ | 0.710        | 0.694           | 0.663           | 0.645            | 0.700           | 0.628              |

Dir: Dirichlet distribution used to simulate "true" admixture coefficients using 3 ancestral populations.
